# Supplementary material
Source: publisher figshare collection journal article supplement (https://tandf.figshare.com/ndownloader/files/13203950)
Supplement: Supplementary file 1 [file 13203950]

## SUPPLEMENTARY MATERIAL

### A new dimeric alkylresorcinol from the stem barks of *Swintonia floribunda* (Anacardiaceae)

Phu H. Dang,<sup>a</sup> Linh T. T. Nguyen,<sup>a</sup> Hue T. T. Nguyen,<sup>a</sup> Tho H. Le,<sup>a</sup> Truong N. V. Do,<sup>a</sup> Hai X. Nguyen,<sup>a</sup> Nghia D. Le,<sup>a</sup> Mai T. T. Nguyen<sup>a,b</sup> and Nhan T. Nguyen<sup>a,b,\*</sup>

<sup>a</sup>Faculty of Chemistry, VNUHCM–University of Science, Vietnam

<sup>b</sup>Cancer Research Laboratory, Vietnam National University, Ho Chi Minh City, Vietnam

#### ABSTRACT

From an EtOAc-soluble fraction of the stem barks of *Swintonia floribunda* (Anacardiaceae), one new dimeric alkylresorcinol named integracin E (**1**), together with 4 known compounds (**2–5**) were isolated. Their chemical structures were elucidated based on the spectroscopic data interpretation. The absolute configuration of **1** was determined by the specific rotation analysis of its acid-catalyzed hydrolysis product. Compound **1** showed potent tyrosinase inhibitory activity with an IC<sub>50</sub> value of 48.2  $\mu$ M.

Keywords: *Swintonia floribunda*, Anacardiaceae, alkylresorcinol, tyrosinase inhibitory.

**Table S1.** NMR Spectroscopic Data for Compound **1** in CDCl<sub>3</sub>.

| Position | Integracin E ( <b>1</b> )  |                                              |
|----------|----------------------------|----------------------------------------------|
|          | $\delta_{\text{C}}$ , type | $\delta_{\text{H}}$ ( <i>J</i> in Hz)        |
| 1        | 105.5, C                   | –                                            |
| 2        | 165.4, C                   | –                                            |
| 3        | 101.6, CH                  | 6.29, d (2.6)                                |
| 4        | 160.4, C                   | –                                            |
| 5        | 111.0, CH                  | 6.24, d (2.6)                                |
| 6        | 149.1, C                   | –                                            |
| 7        | 37.1, CH <sub>2</sub>      | 2.86, dt (12.9, 7.9)<br>2.81, dt (12.9, 7.9) |
| 8        | 32.4, CH <sub>2</sub>      | 1.53, m                                      |
| 9–16     | 29.0–29.9, CH <sub>2</sub> | 1.22–1.45                                    |
| 17       | 32.1, CH <sub>2</sub>      | 1.26, m                                      |
| 18       | 22.8, CH <sub>2</sub>      | 1.29, m                                      |
| 19       | 14.3, CH <sub>3</sub>      | 0.88, t (6.9)                                |
| 1'       | 146.1, C                   | –                                            |
| 2'/6'    | 108.2, CH                  | 6.21, d (2.1)                                |
| 3'/5'    | 156.8, C                   | –                                            |
| 4'       | 100.4, CH                  | 6.18, brs                                    |
| 7'       | 35.9, CH <sub>2</sub>      | 2.44, t (7.7)                                |
| 8'       | 30.9, CH <sub>2</sub>      | 1.53, m                                      |
| 9'       | 30.2, CH <sub>2</sub>      | 1.35, m                                      |
| 10', 11' | 29.0–29.9, CH <sub>2</sub> | 1.22–1.45                                    |
| 12'      | 25.5, CH <sub>2</sub>      | 1.36, m                                      |
| 13'      | 34.4, CH <sub>2</sub>      | 1.65, m                                      |
| 14'      | 76.0, CH                   | 5.26, m                                      |
| 15'      | 36.8, CH <sub>2</sub>      | 1.65, m                                      |
| 16'      | 19.0, CH <sub>2</sub>      | 1.41, m                                      |
| 17'      | 14.1, CH <sub>3</sub>      | 0.94, t (7.3)                                |
|          | 171.7, C=O                 | –                                            |
| 2-OH     | –                          | 12.13, brs                                   |

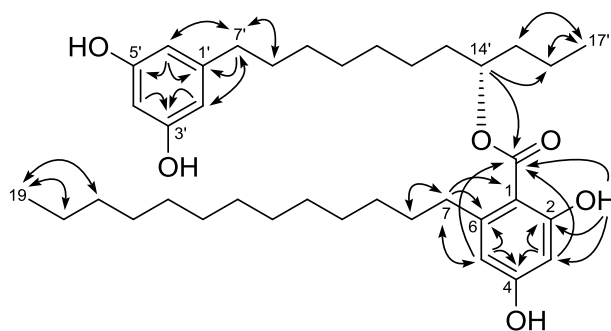

**Figure S1.** Significant HMBC correlations observed for compound **1**.

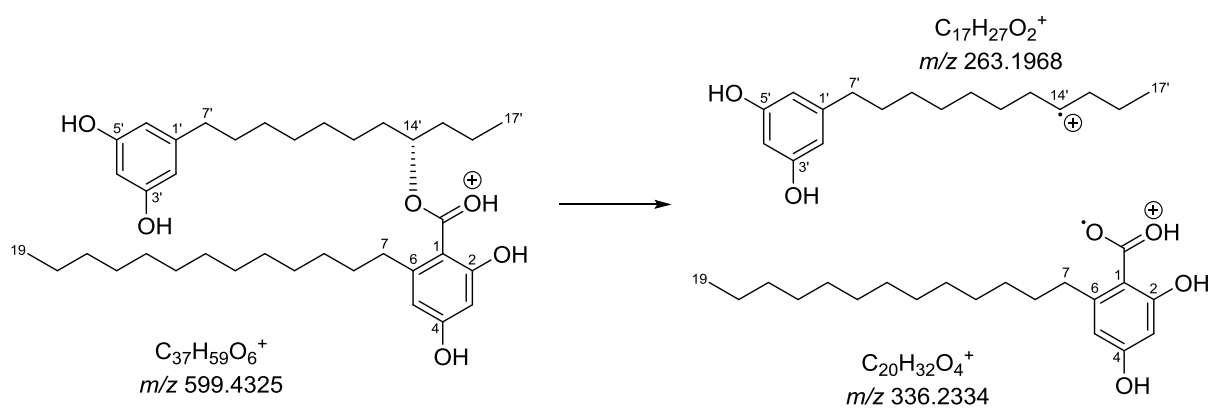

**Figure S2.** MS fragmentation of **1**.

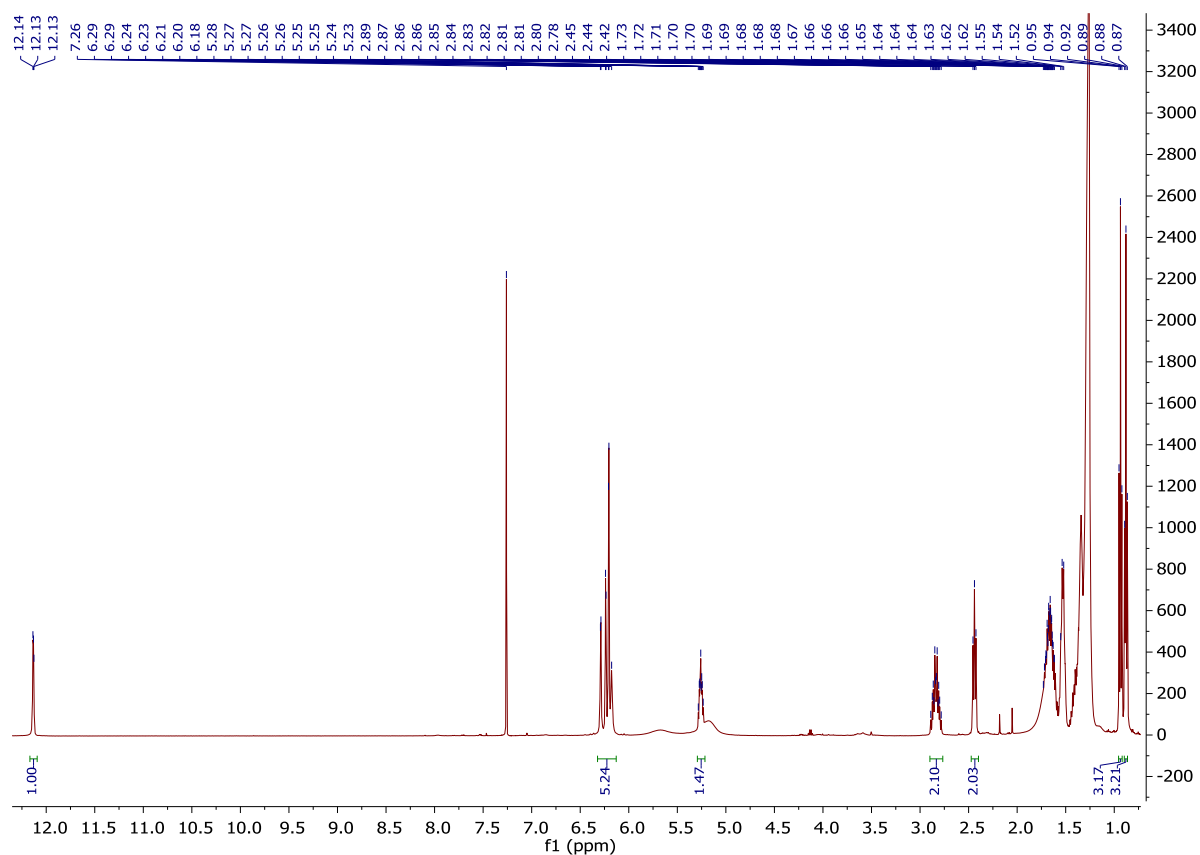

**Figure S3.**  $^1\text{H}$  NMR spectrum of **1** (500 MHz,  $\text{CDCl}_3$ ).

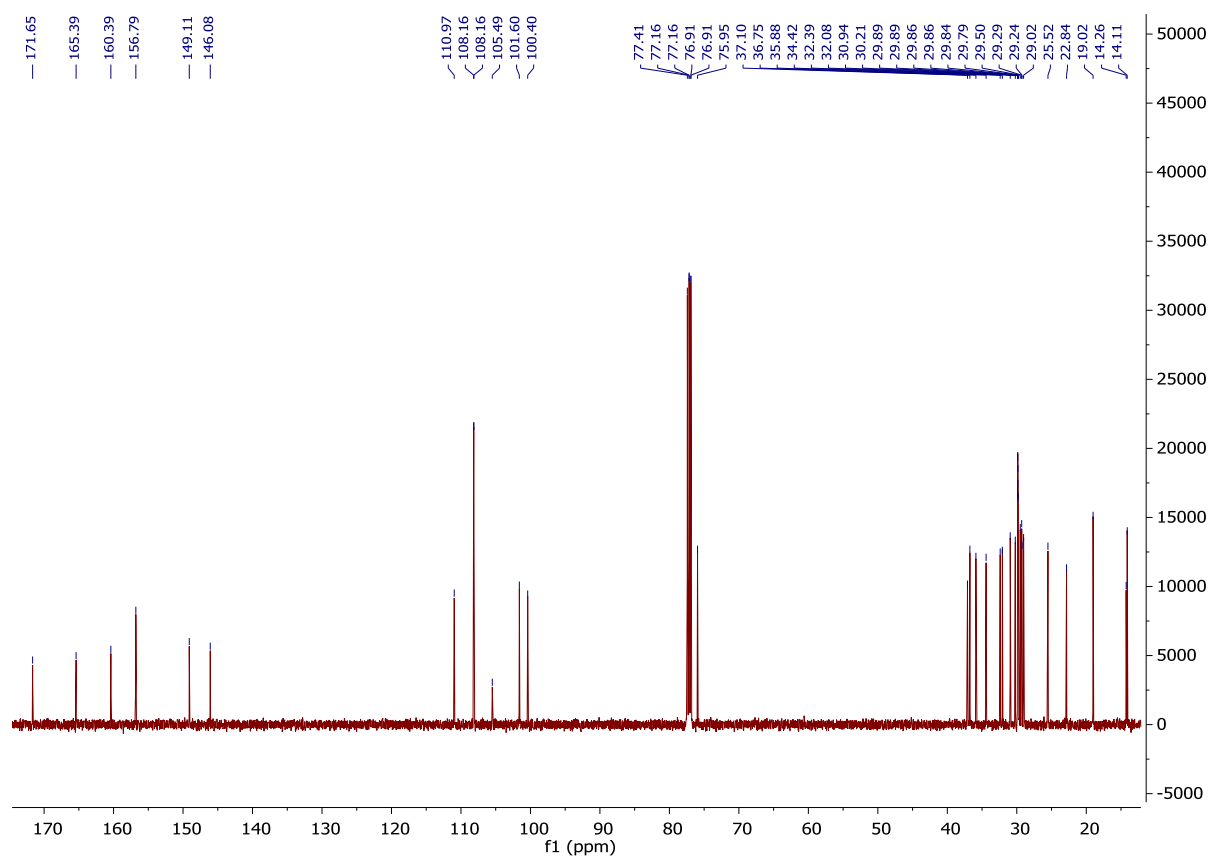

**Figure S4.**  $^{13}\text{C}$  NMR spectrum of **1** (125 MHz,  $\text{CDCl}_3$ ).

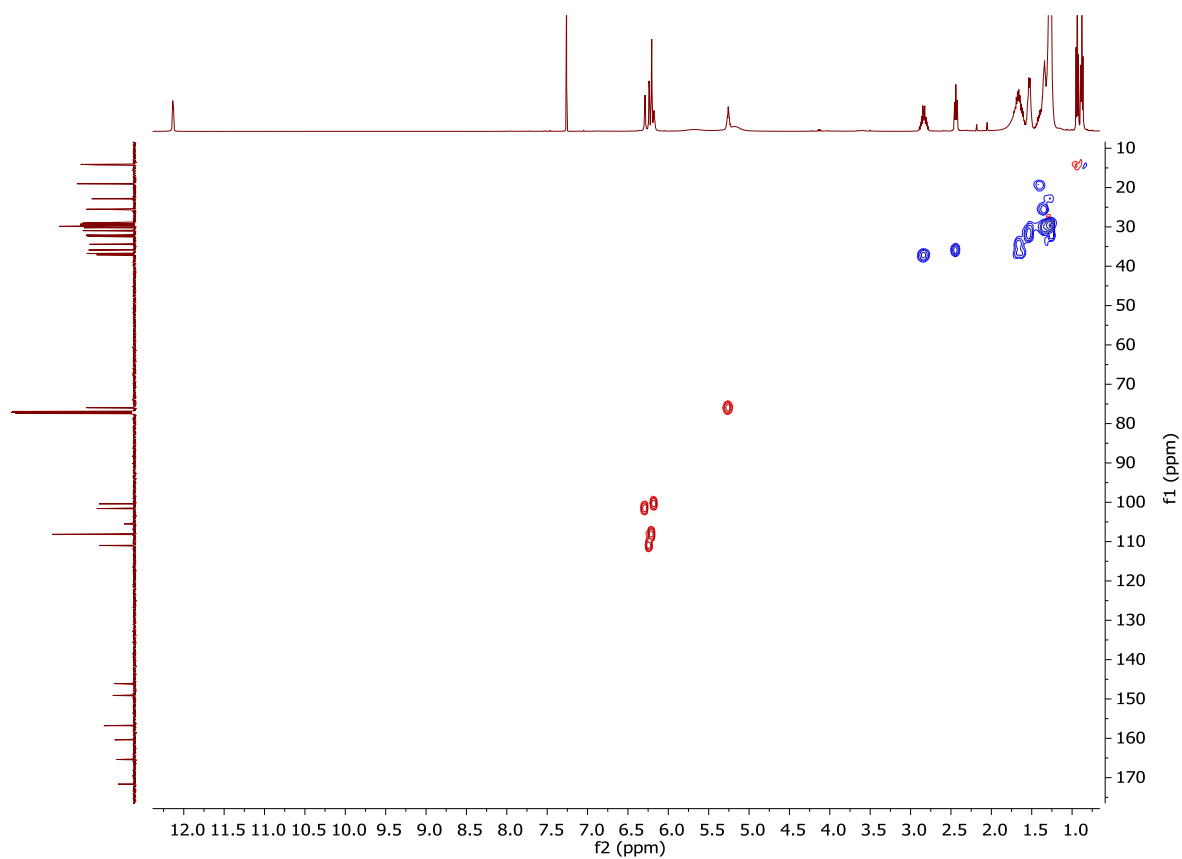

**Figure S5.** HSQC NMR spectrum of **1**.

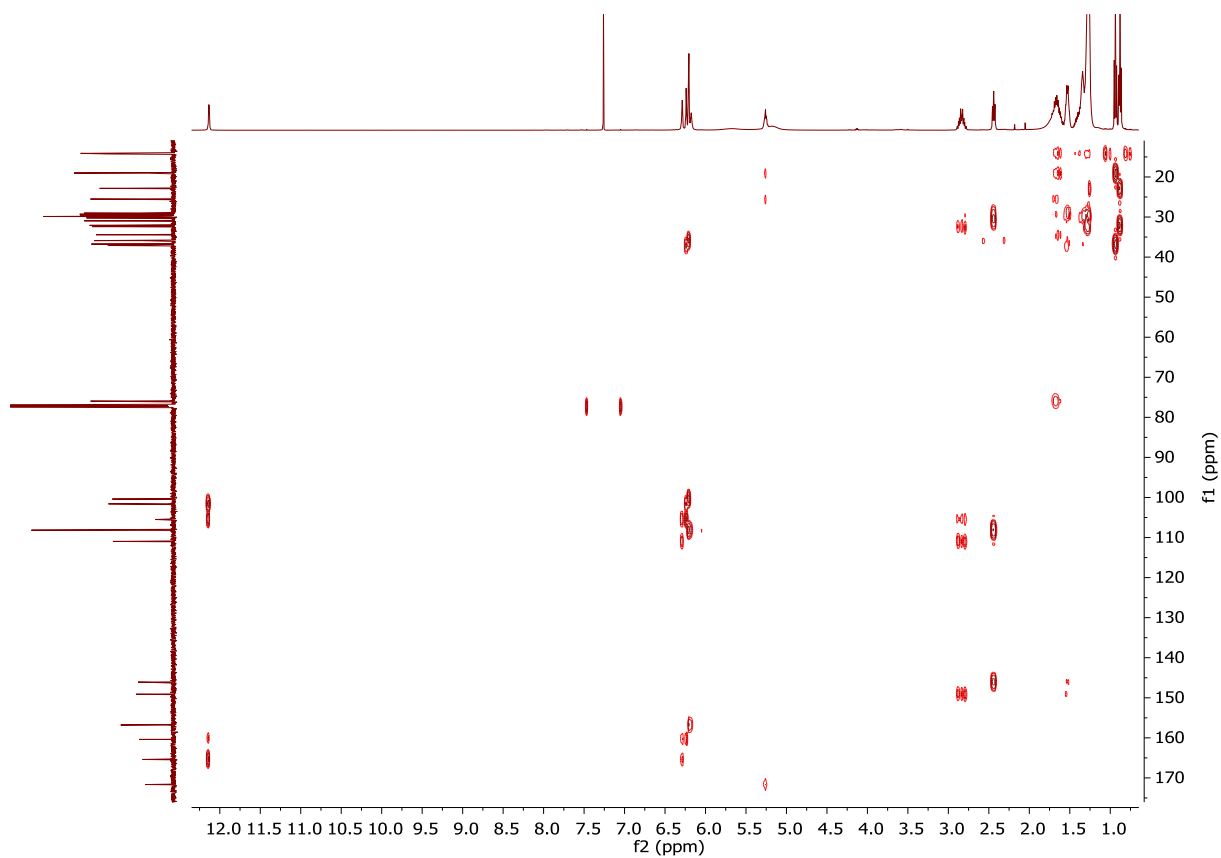

**Figure S6.** HMBC NMR spectrum of **1**.

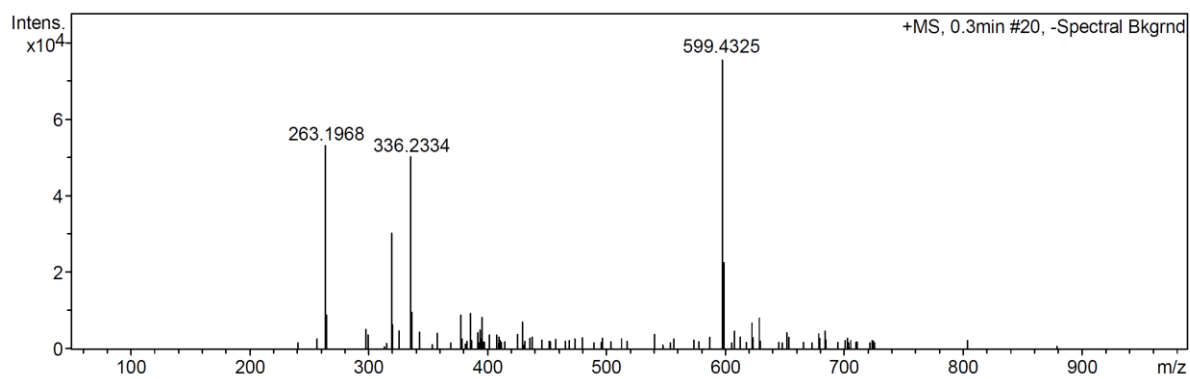

**Figure S7. HRESIMS of 1.**

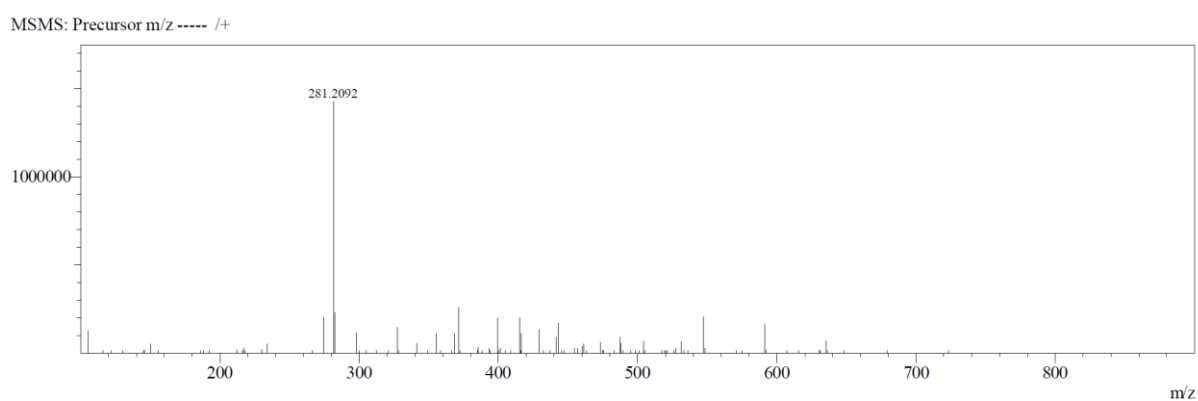

**Figure S8. HRESIMS of 1a.**

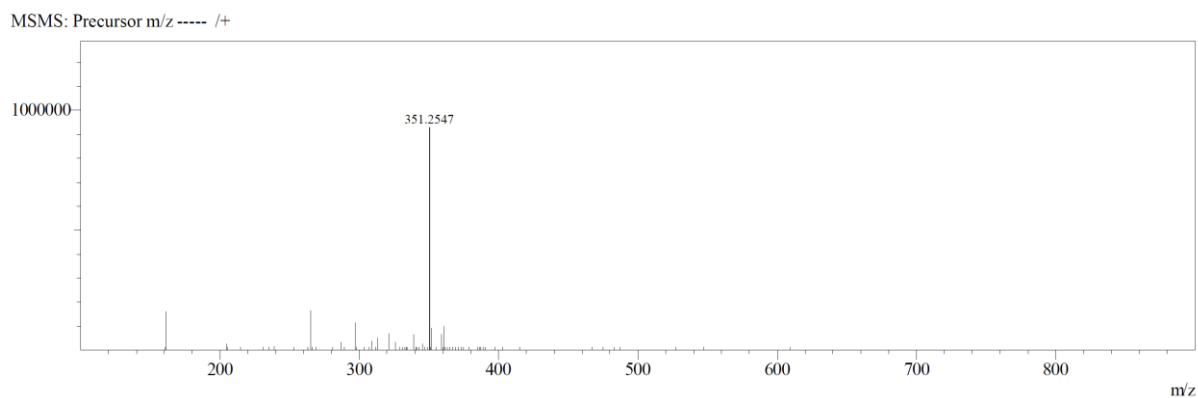

**Figure S9. HRESIMS of 1b.**
